# Supplementary material for: Do Occupational and Patient Safety Culture in Hospitals Share Predictors in the Field of Psychosocial Working Conditions? Findings from a Cross-Sectional Study in German University Hospitals
Source: PubMed Central journal article supplement (PMC6210136; doi:10.3390/ijerph15102131), 2018-09-27
Supplement: ijerph-15-02131-s001.pdf [file ijerph-15-02131-s001.pdf]

**Table S1.** Additional correlations of independent variables (COPSOQ, adapted CBI, TLI short, TWINS) with the two dependent variables.

| Independent variables (scales, factors and single items)              | Dependent variable <sup>1</sup>                                                              |                                                                                         |
|-----------------------------------------------------------------------|----------------------------------------------------------------------------------------------|-----------------------------------------------------------------------------------------|
|                                                                       | Pearson correlation with the dependent variable <sup>1</sup> for Occupational Safety Culture | Pearson correlation with the dependent variable <sup>2</sup> for Patient Safety Culture |
| <i>COPSOQ – Psychosocial working conditions</i>                       |                                                                                              |                                                                                         |
| Quantitative demands (scale)                                          | -0.25 **                                                                                     | -0.30 **                                                                                |
| Emotional demands (scale)                                             | -0.23 **                                                                                     | -0.17 **                                                                                |
| Work–privacy conflict (scale)                                         | -0.33 **                                                                                     | -0.28 **                                                                                |
| Influence at work (scale)                                             | 0.23 **                                                                                      | 0.32 **                                                                                 |
| Degree of freedom at work (scale)                                     | 0.28 **                                                                                      | 0.31 **                                                                                 |
| Possibilities for development (scale)                                 | 0.12 **                                                                                      | 0.24 **                                                                                 |
| Meaning of work (scale)                                               | 0.22 **                                                                                      | 0.31 **                                                                                 |
| Workplace commitment (scale)                                          | 0.19 **                                                                                      | 0.34 **                                                                                 |
| Predictability (scale)                                                | 0.26 **                                                                                      | 0.43 **                                                                                 |
| Role clarity (scale)                                                  | 0.21 **                                                                                      | 0.33 **                                                                                 |
| Role conflicts (scale)                                                | -0.31 **                                                                                     | -0.42 **                                                                                |
| Social relations (scale)                                              | 0.06 *                                                                                       | 0.08 *                                                                                  |
| Feedback (scale)                                                      | 0.09 **                                                                                      | 0.26 **                                                                                 |
| Social support (scale)                                                | 0.17 **                                                                                      | 0.29 **                                                                                 |
| Sense of community (scale)                                            | 0.17 **                                                                                      | 0.23 **                                                                                 |
| Quality of leadership (scale)                                         | 0.23 **                                                                                      | 0.41 **                                                                                 |
| Job satisfaction (scale)                                              | 0.40 **                                                                                      | 0.54 **                                                                                 |
| <i>Adapted from CBI – Psychosocial working conditions</i>             |                                                                                              |                                                                                         |
| Patient-related burnout (scale)                                       | -0.35 **                                                                                     | -0.30 **                                                                                |
| <i>TLI short – Transformational leadership</i>                        |                                                                                              |                                                                                         |
| Transformational leadership (scale)                                   | 0.21**                                                                                       | 0.39 **                                                                                 |
| <i>TWINS Occupational Safety – Patient Safety</i>                     |                                                                                              |                                                                                         |
| Supervisor support (scale)                                            | 0.23 **                                                                                      | 0.57 **                                                                                 |
| Safety-related behaviour of the direct supervisor (factor)            | 0.20 **                                                                                      | 0.45 **                                                                                 |
| Safety-related behaviour of the hospital management (factor)          | 0.24 **                                                                                      | 0.55 **                                                                                 |
| Individual influence on implementation at the workplace (single item) | 0.21 **                                                                                      | 0.46 **                                                                                 |

<sup>1</sup> Dependent variable: personal perception of the frequency of occupational risks (index)

<sup>2</sup> Dependent variable: perceived patient safety (factor)

\* Correlation is significant at the 0.05 level (two-tailed)

\*\* Correlation is significant at the 0.01 level (two-tailed)
